# Supplementary material
Source: PubMed Central journal article supplement (PMC2785696)
Supplement: supp_M109.029538_jbc.M109.029538-1.pdf [file supp_M109.029538_jbc.M109.029538-1.pdf]

### **Supplemental Figure 1. Micrographs**

#### **Effect of adenoviral particles on c2c12 differentiation**

SH3 adenovirus expressing IRES GFP (AdHA-SH3-GFP) or expressing GFP alone (AdGFP) at various concentrations of infectious particles (multiplicity of infection: MOI) were incubated with c2c12 cells for 24h. The cells were then induced to differentiate by incubation in low serum medium. Shown are phase and GFP fluorescent micrographs after 4 days in low serum medium. In AdHA-SH3-GFP infected cultures, cells that are positively infected (GFP positive) demonstrate poor phenotypical characteristics of myoblast differentiation (i.e., elongation and fusion). Cells infected with AdGFP at high titres were able to differentiate effectively.

### **Supplemental Figure 1. Table**

#### **Infection with high viral titers does not cause excessive cell death**

c2c12 cells were infected with SH3 adenovirus expressing IRES GFP (AdHA-SH3-GFP) or expressing GFP alone (AdGFP) at a variety of infectious particle concentrations (multiplicity of infection: MOI) for 24 hours. The cells were then collected and analyzed for live/dead status by Trypan blue staining. Shown are the average values following three trials for each adenovirus at the respective concentrations. Very low levels of dead cells (Trypan blue +) were identified in the cultures tested.

Supplemental Figure 1

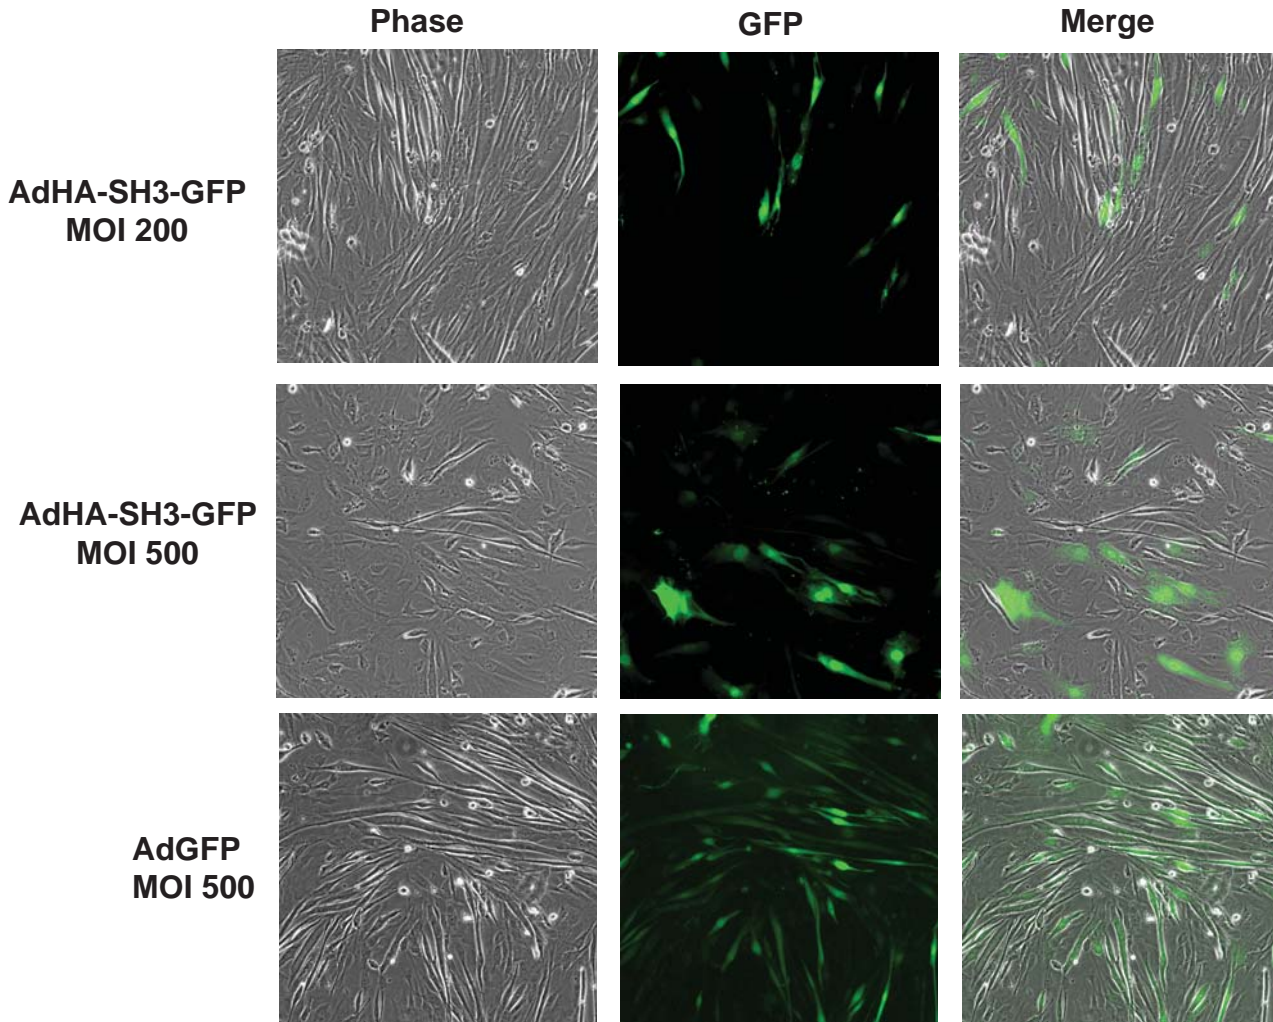

Number of live/dead cells at 24h post adenoviral infection

|                     | MOI | Total Cells | Trypan Blue + |
|---------------------|-----|-------------|---------------|
| <b>AdHA-SH3-GFP</b> | 0   | 262         | 3             |
|                     | 200 | 178         | 2             |
|                     | 500 | 257         | 6             |
| <b>AdGFP</b>        | 0   | 253         | 3             |
|                     | 200 | 262         | 3             |
|                     | 500 | 257         | 4             |
